# Supplementary material
Source: publisher figshare collection journal article supplement (https://tandf.figshare.com/articles/dataset/_/26536391)
Supplement: Supplementary file 1 [file 1]

**Supplementary figure**

**AP3B1 facilitates PDIA3/ERP57 function to regulate rabies virus glycoprotein selective degradation and viral entry**

Yuelan Zhanga,b, Xinyi Zhanga,b, Xue Yanga,b, Linyue Lva,b, Qinyang Wanga,b, Shaowei Zenga,b, Zhuyou Zhanga,b, Martin Dorfc, Shitao Lid, Ling Zhaoe,f, Bishi Fua,b

aDepartment of Rheumatology and Immunology, State Key Laboratory of Virology, Zhongnan Hospital, Wuhan University, Wuhan, 430071, China.
bFrontier Science Center for Immunology and Metabolism, Medical Research Institute, School of Medicine, Wuhan University, Wuhan, 430071. China.
cDepartment of Microbiology & Immunobiology, Harvard Medical School, Boston, Massachusetts, United States of America
dDepartment of Microbiology and Immunology, Tulane University, New Orleans, LA, 70112, USA

eState Key Laboratory of Agricultural Microbiology, Huazhong Agricultural University, Wuhan, 430070, China.

fKey Laboratory of Preventive Veterinary Medicine of Hubei Province, Huazhong Agricultural University, Wuhan, 430070, China.

**Contact** Bishi Fu [bishi_fu@whu.edu.cn](mailto:bishi_fu@whu.edu.cn)Frontier Science Center for Immunology and Metabolism, Medical Research Institute, School of Medicine, Wuhan University, 185 Donghu Road, Wuchang District, Wuhan, 430071. China.


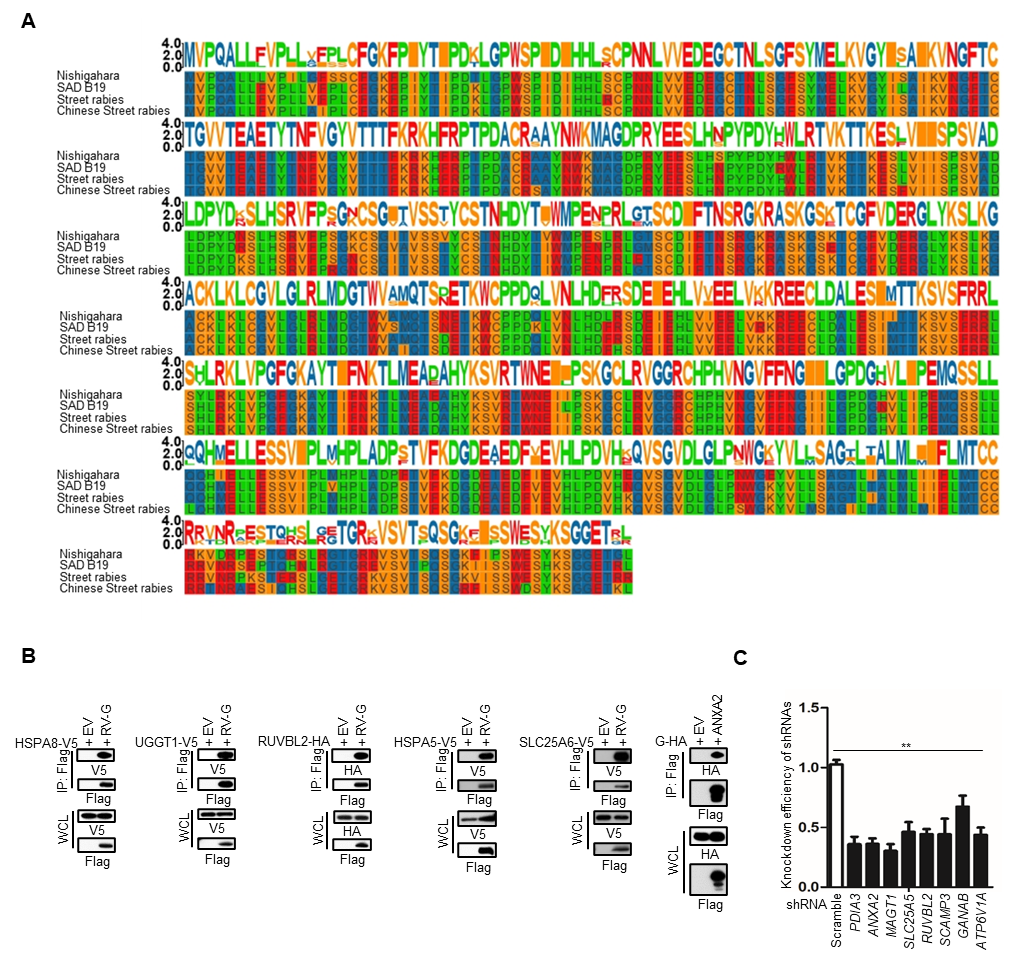


**Figure S1**. Identification of candidates for inhibiting RABV infection. (**A**) Ortholog alignment analysis of G proteins of Nishigahara, SAD B19, street rabies virus, and Chinese street rabies virus by Tbtool software. (**B**) Binding of RV-G to HSPA8, UGGT1, RUVBL2, HSPA5, SLC25A6 and ANXA2 were confirmed with co-immunoprecipitation. (**C**) qRT-PCR to validate the knockdown efficiency of part of shRNAs. n = 3 independent experiments; data are presented as mean ± SD. ***p <*0.01.


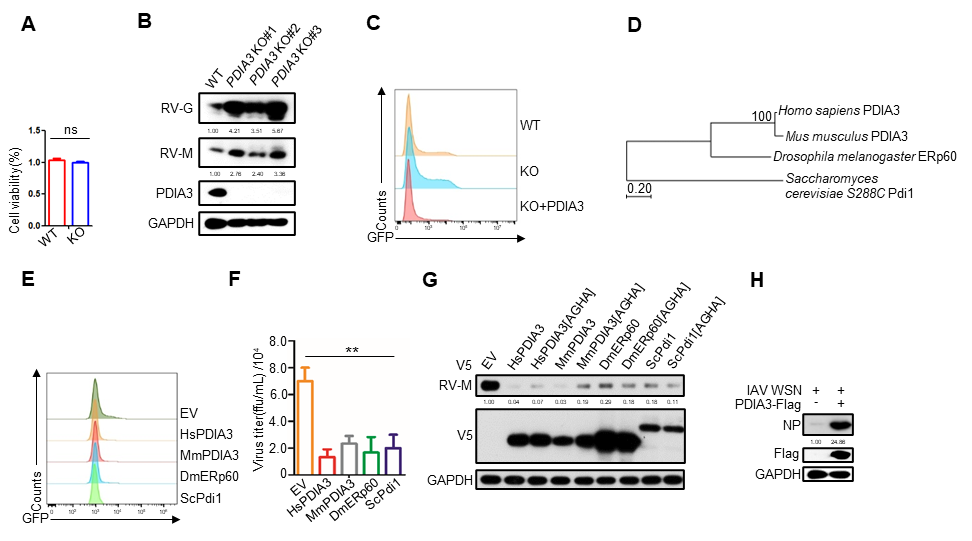


**Figure S2**. PDIA3 inhibits RABV infection. (**A**) Cell viability of HEK293 and *PDIA3* KO cells determined by MTT assays. n = 3 independent experiments; data are presented as mean ± SD. ns is not significant. (**B**) Western blot of RABV viral protein level at forty-eight h.p.i. HEK293 and three clones of *PDIA3* KO cells. Cells were infected with RABV strain CVS 11. (**C**) The percentage of GFP+ cells was determined via flow cytometry. HEK293, *PDIA3* KO and *PDIA3* KO overexpressing PDIA3-Flag tagged cell lines were treated with RABV-EGFP for forty-eight h. (**D**) Phylogenetic analysis of PDIA3/PDI from different species. (**E**) SH-SY5Y cells respectively transfected with EV, *Homo sapiens PDIA3* (*HsPDIA3*), *Mus musculus* Pdia3 (*MmPdia3*), *Drosophila melanogaster ERp60* (*DmERp60*), *Saccharomyces cerevisiae S288C PDI1* (*ScPDI1*), were treated with RABV-GFP for forty-eight h. Percent of GFP+ cells of these groups were quantified by flow cytometry. (**F**) SH-SY5Y cells respectively transfected with EV, *HsPDIA3*, *MmPdia3*, *DmERp60* and *ScPDI1* were treated with CVS 11 for forty-eight h. Supernatants were collected and virus titers were measured by a focus-forming assay. n = 3 independent experiments; data are presented as mean ± SD. ***p*< 0.01. (**G**) HEK293 cells were transfected with V5-tagged EV, *HsPDIA3*, *HsPDIA3[AGHA]*, *MmPdia3*, *MmPdia3[AGHA]*, *DmERp60*, *DmERp60[AGHA]*, *ScPDI1*, *ScPDI1[AGHA]*, respectively and treated with RABV for forty-eight h. RABV G protein levels were tested by western blot. (**H**) Western blot of IAV NP level at eighteen h.p.i. in HEK293 cells transfected with GFP or *HsPDIA3* fused with Flag tag. Cells were infected with IAV WSN.


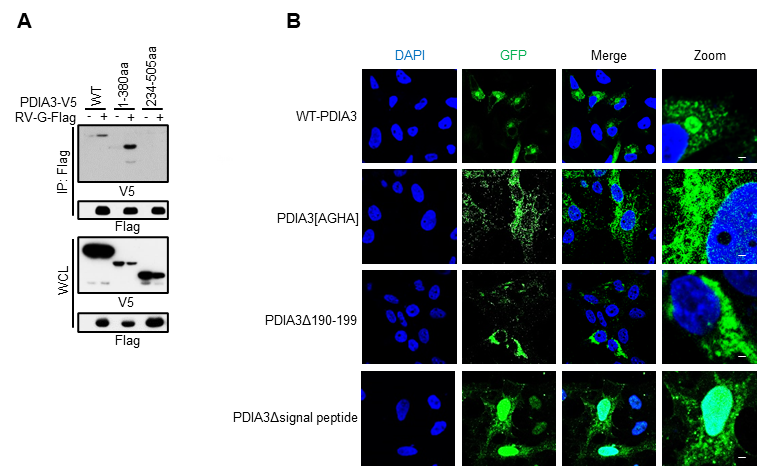


**Figure S3**. The 1-380aa of PDIA3 interacts with the RABV G protein. (**A**) Binding of PDIA3 truncations 1-380 aa, 234-505 aa fused-V5 to RABV G protein fused with Flag (RV-G-Flag), determined by Flag-IP and IB with anti-Flag and anti-V5. (**B**) Confocal analysis of EGFP-tagged WT PDIA3, PDIA3[AGHA], PDIA3Δ190-199, PDIA3Δsignal peptide in HeLa cells. Scale bar: 2 μm.


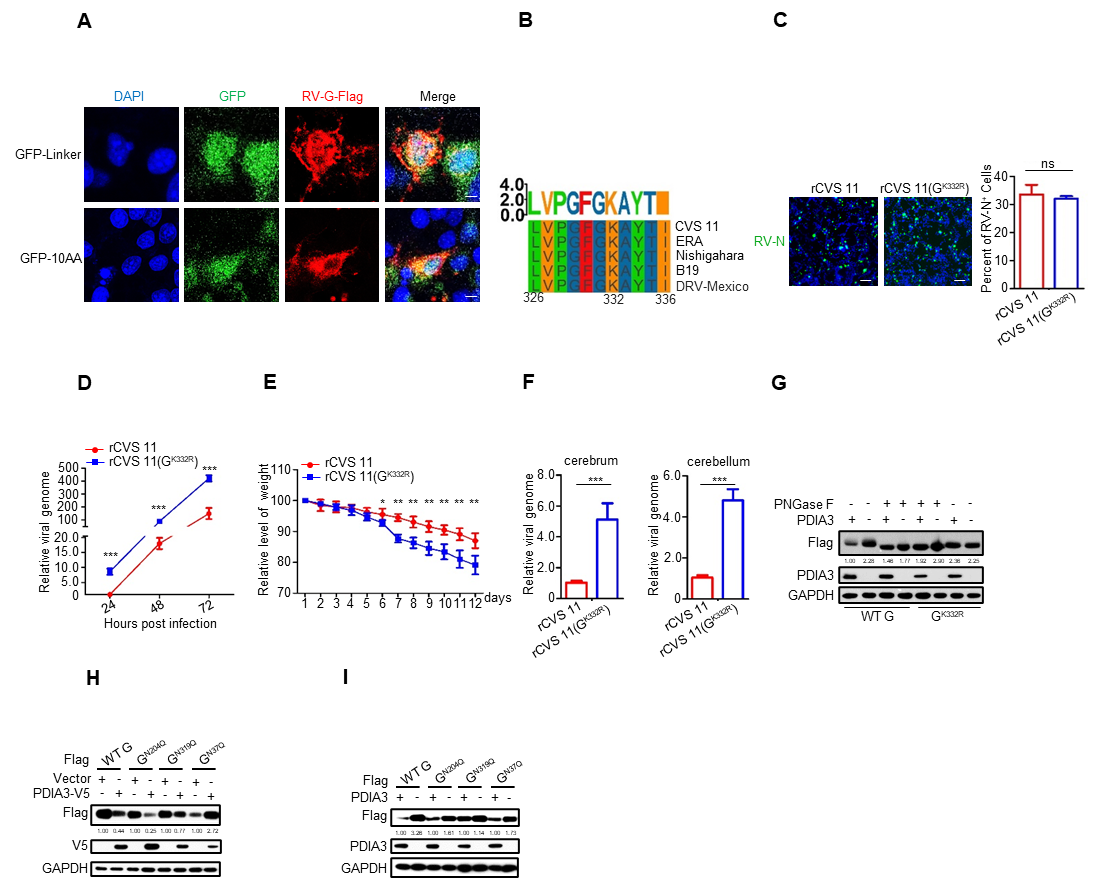


**Figure S4**. PDIA3 promotes the selective degradation of RABV G protein. (**A**) Confocal analysis of 190-199 aa fused to GFP and RV-G-Flag in A549 cells. Scale bar: 2 μm. (**B**) Ortholog alignment analysis of the residue 326-336 amino acids of glycoprotein from different RABV strains. (**C**) Images of rCVS 11 and rCVS 11(GK332R) infected cells at MOI of 3. Cells were fixed at twelve h post-infection and stained with anti-RABV N antibody for RABV N (green) and Hoechst 33342 for the nucleus (blue). Scale bar: 20 μm. The percent of RV-N+ was calculated by ImageJ software. n = 3 independent experiments; data are presented as mean ± SD. ns is not significant. (**D**) Viral growth curve. Supernatants were collected at the indicated time points, and virus titers were measured by a focus forming assay. n = 3 independent experiments; data are presented as mean ± SD. ****p*<0.001. (**E**) Weight of mice that were treated with rCVS 11 and rCVS 11(GK332R). C57BL/6J mice were infected by nasal inhalation of rCVS 11 and rCVS 11(GK332R). The mice were monitored daily for body weight. n = 4 independent experiments; data are presented as mean ± SD. **p*<0.05, ***p*< 0.01. (**F**) qRT-PCR analysis of RABV genome mRNA level of cerebrum and cerebellum from rCVS 11 and rCVS 11(GK332R) treated mice at five days post-infection. data are presented as mean ± SD. ****p* < 0.001. (**G**) Western blot of RABV G protein (RV-G-Flag) level in HEK293 and *PDIA3* KO cells treated with PNGase F. (**H**) Western blot of RABV G level with the key glycosylation site Asn37, Asn204, or Asn319 mutations in HEK293 cells which transiently expressed PDIA3. (**I**) Western blot of RABV G level with the key glycosylation site Asn37, Asn204, or Asn319 mutations in HEK293 and *PDIA3* KO cells.

**
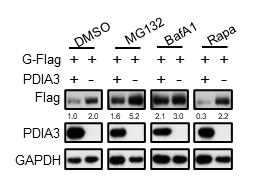
**

**Figure S5**. PDIA3 mediates the degradation of G protein via autophagosome-lysosome pathway. Immunoblot analysis of RABV CVS 11 G protein in HEK293 and *PDIA3* KO cells which were treated with MG132 (10 mM), BafA1(1 µM), and rapamycin (Rapa, 100 nM) for twelve h.


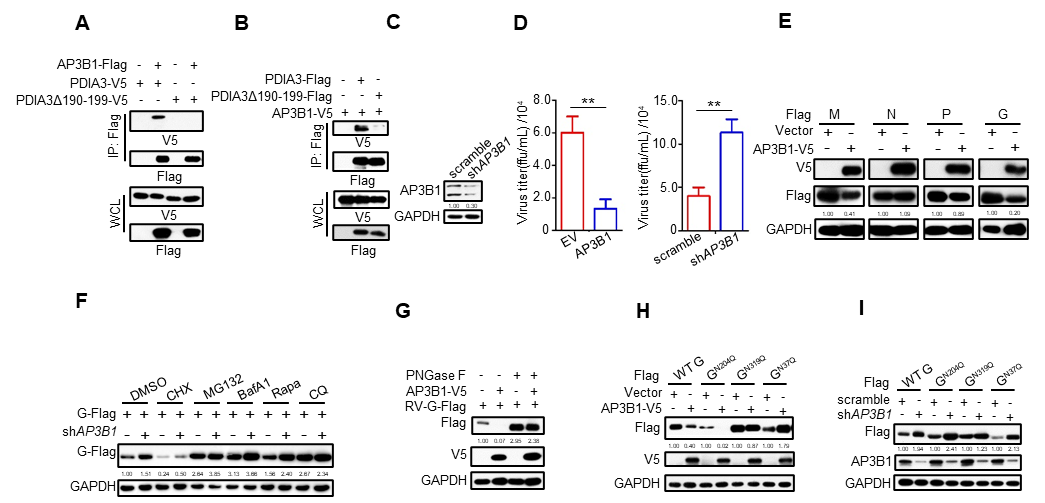


**Figure S6**. AP3B1 is essential for PDIA3 inhibiting rabies virus infection. (**A**) Binding of AP3B1 fused-Flag to PDIA3-V5 or PDIA3Δ190-199-V5, determined by Flag-IP and IB with anti-Flag and anti-V5. (**B**) Binding of PDIA3 or PDIA3Δ190-199 fused-Flag to AP3B1-V5, determined by Flag-IP and IB with anti-Flag and anti-V5. (**C**) Western blot to verify the knockdown efficiency of sh*AP3B1*. (**D**) HEK293 cells respectively transfected with EV, *AP3B1*, scramble shRNA and sh*AP3B1* were treated with CVS 11 for forty-eight h. Supernatants were collected and virus titers were measured by a focus forming assay. n = 3 independent experiments; data are presented as mean ± SD. ***p<*0.01. (**E**) Western blot of RABV viral proteins level in HEK293 which transfected with EV or *AP3B1*. (**F**) Western blot of RABV G protein level in *AP3B1*-knockdown HEK293 cells which were treated with CHX (25 ug/mL), MG132 (10 mM), BafA1 (1 µM), rapamycin (Rapa, 100 nM), or chloroquine (CQ, 20 μM) for twelve h. (**G**) Western blot of RABV G protein (RV-G-Flag) level in HEK293 cells which transfected with EV or *AP3B1* and treated with PNGase F. (**H**) Western blot of RABV G level with the key glycosylation site Asn37, Asn204, or Asn319 mutations in HEK293 cells which transiently expressed AP3B1. (**I**) Western blot of RABV G level with the key glycosylation site Asn37, Asn204, or Asn319 mutations in *AP3B1*-knockdown HEK293 cells.


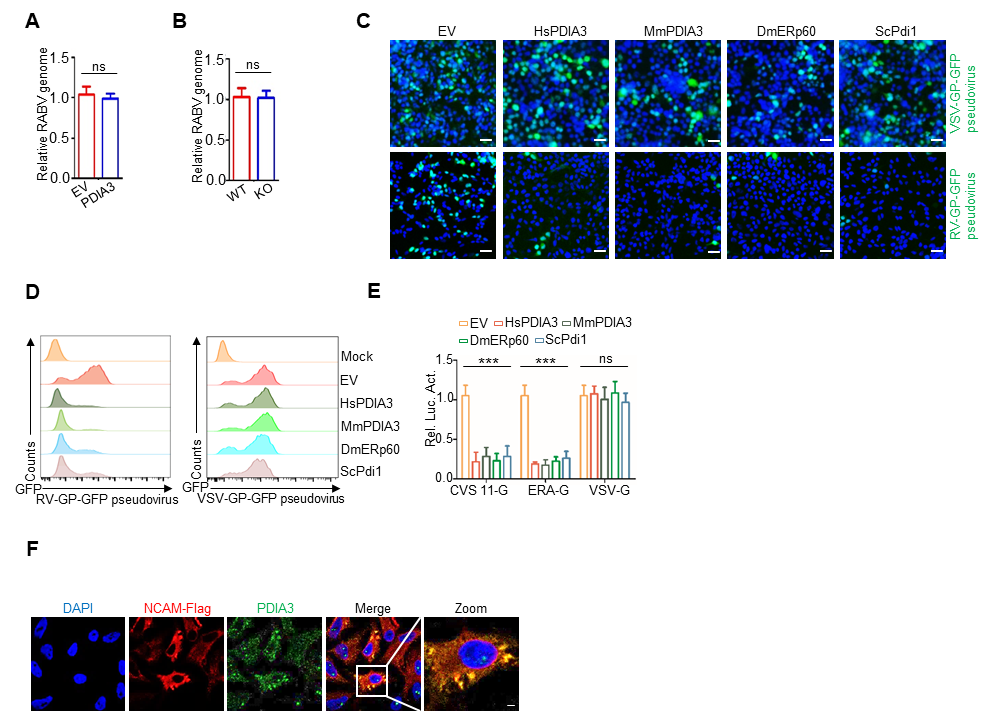


**Figure S7**. PDIA3 restricts RABV entry into host cells. (**A**) RABV viral genome RNA of HEK293 cells overexpressing PDIA3. HEK293 cells were transfected with *PDIA3*. RABV viral genome RNA was transfected into cells by Lipofectamine 2000. forty-eight h after RNA transfection, the viral RNA level of cells was quantified by qRT-PCR. ns is not significant. (**B**) RABV viral genome RNA of HEK293 and *PDIA3* KO cells. RABV viral genome RNA was transfected into cells by Lipofectamine 2000. forty-eight h after RNA transfection, the viral RNA level of cells was quantified by qRT-PCR. ns is not significant. (**C**) IFA of CVS 11 and VSV glycoprotein-GFP pseudovirus in SH-SY5Y cells which transfected with EV, *HsPDIA3*, *MmPdia3*, *DmERp60* and *ScPDI1*, respectively. Scale bar: 50 μm. (**D**) The percentage of GFP+ cells was determined via flow cytometry. CVS 11 and VSV glycoprotein-GFP-pseudovirus in SH-SY5Y cells lines transfected with EV, *HsPDIA3*, *MmPdia3*, *DmERp60* and *ScPDI1*, respectively. (**E**) Luciferase reporter activity of CVS 11, ERA, and VSV glycoprotein pseudotyped viruses in HEK293 cells which transfected with EV, *HsPDIA3*, *MmPdia3*, *DmERp60* and *ScPDI1*, respectively. n = 3 independent experiments; data are presented as mean ± SD. ****p*< 0.001. ns is not significant. (**F**) Confocal analysis of NCAM-Flag with endogenous PDIA3 in HeLa cells. Scale bar: 2 μm.


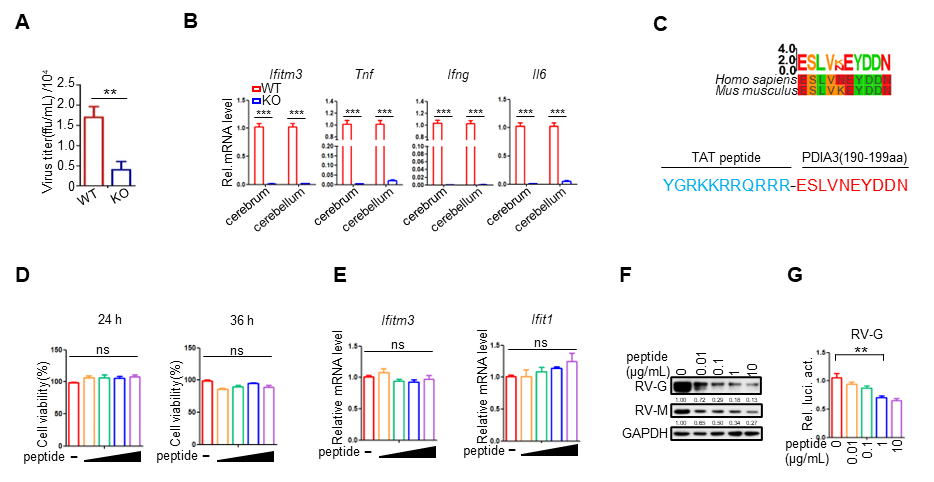


**Figure S8**. The 190–199 amino-acid region of PDIA3 is sufficient to defend against RABV. (**A**) HEK293 and *PDIA3* KO cells were treated with CVS 11 for forty-eight h. Supernatants were collected and virus titers were measured by a focus forming assay. n = 3 independent experiments; data are presented as mean ± SD. ***p*< 0.01. (**B**) qRT-PCR analysis of *Ifitm3,* *Tnf, Ifng* and *Il6* mRNA level of cerebrum from mice whom administered with RABV from supernatants of HEK293 or *PDIA3* KO cells according to Figure 8B. n = 3 independent experiments; data are presented as mean ± SD. ****p*< 0.001. (**C**) Ortholog alignment analysis of the 190-199 aa residues of HsPDIA3 and MmPDIA3. Schematic diagram of TAT-PDIA3 peptide (190-199aa). (**D**) *In vitro* cytotoxicity of HEK293 cells treated with TAT-PDIA3 peptide in different concentrations, determined by MTT assays. n = 3 independent experiments; data are presented as mean ± SD. ns is not significant. (**E**) qRT-PCR analysis of *Ifitm3* and *Ifit1* mRNA levels in HEK293 cells with or without treating TAT-PDIA3 peptide in different concentrations for twenty-four h. n = 3 independent experiments; data are presented as mean ± SD. ns is not significant. (**F**) Western blot of RABV viral protein levels in HEK293 cells with or without treating TAT-PDIA3 peptide in different concentration. The cells were challenged with RABV CVS 11 for forty-eight h. (**G**) Luciferase reporter activity of RABV glycoprotein pseudotyped viruses (RV-G) in HEK293 cell with or without treating TAT-PDIA3 peptide in different concentration. n = 3 independent experiments; data are presented as mean ± SD. ***p<* 0.01.
